# Supplementary material for: Genome-wide analysis of genetic diversity and artificial selection in Large White pigs in Russia
Source: PeerJ journal article supplement (doi:10.7717/peerj.11595), 2021-07-02

D

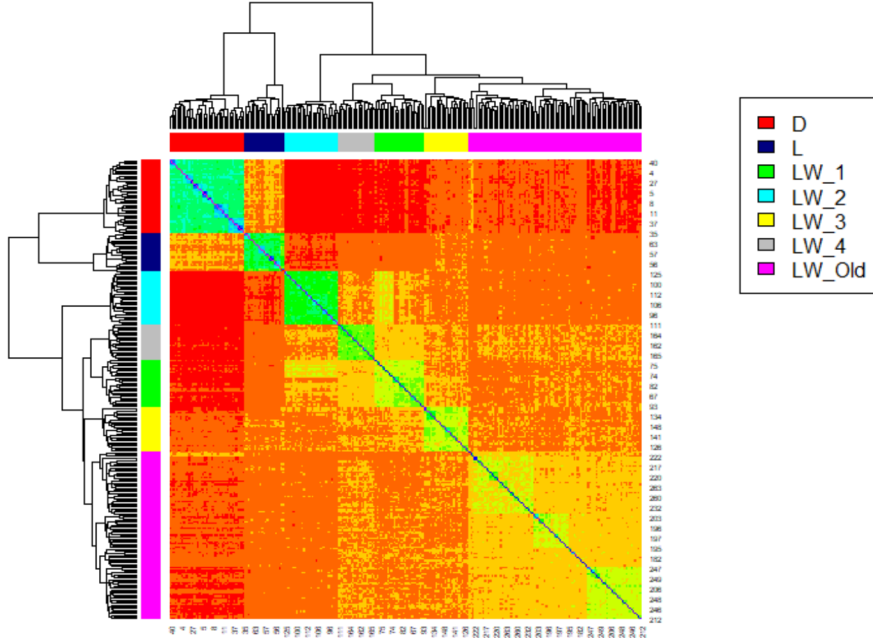

Supplement: Figure_3(D).pdf [file Figure_3%28D%29.pdf]
